# Supplementary material for: INI1/SMARCB1 Rpt1 domain mimics TAR RNA in binding to integrase to facilitate HIV-1 replication
Source: PubMed Central journal article supplement (PMC8115288; doi:10.1038/s41467-021-22733-9), 2021-05-12
Supplement: 41467_2021_22733_MOESM3_ESM.pdf [file 41467_2021_22733_MOESM3_ESM.pdf]

### Description of Additional Supplementary Files

File Name: Supplementary Data 1

Description: The content of the "Supplementary Data 1" include nine .pdb files of models generated in this report. The corresponding figure numbers are included in the file names.

- Fig1e\_INI1(183-304)robetta-1.pdb
- Fig2\_INI1(183-304)\_CTD\_docked\_no restrinsts\_Savita.pdb
- Fig7ab\_INI1(183-304)\_CTD\_docked\_with restraints-Liming.pdb
- Fig7cd\_TARRAN\_CTD\_docked\_with restraints-Liming.pdb
- SuppleFig5a\_Fullrpt1rpt2model1.pdb
- SuppleFig5a\_Fullrpt1rpt2model2.pdb
- SuppleFig5a\_Fullrpt1rpt2model3.pdb
- SuppleFig5a\_Fullrpt1rpt2model4.pdb
- SuppleFig5a\_Fullrpt1rpt2model5.pdb
